# Supplementary material
Source: PubMed Central journal article supplement (PMC2785385)
Supplement: supp_M109.028589_jbc.M109.028589-1.pdf [file supp_M109.028589_jbc.M109.028589-1.pdf]

**Supplementary Information**  
**Structural plasticity of malaria dihydroorotate dehydrogenases allows  
selective binding of diverse chemical scaffolds**

Xiaoyi Deng<sup>1</sup>, Ramesh Gujjar<sup>2</sup>, Farah El Mazouni<sup>1</sup>, Werner Kaminsky<sup>2</sup>, Nicholas A. Malmquist<sup>1†</sup>, Elisabeth J. Goldsmith<sup>3</sup>, Pradipsinh K. Rathod<sup>2</sup> and Margaret A. Phillips<sup>1\*</sup>  
Departments of <sup>1</sup>Pharmacology and <sup>3</sup>Biochemistry, University of Texas Southwestern Medical Center at Dallas, 6001 Forest Park Rd, Dallas, Texas 75390-9041  
<sup>2</sup>Departments of Chemistry and Global Health, University of Washington, Seattle, WA 98195

**Supplementary Tables and Figures**

**Table S1. Steady-state kinetic analysis of wild-type *Pf*DHODH vs *Pf*DHODH<sub>Δ384-413</sub>**

|                                     | $k_{\text{cat}}$ (s <sup>-1</sup> ) | $K_m$ (DHO) (μM) | $K_m$ CoQ (μM) | IC <sub>50</sub> DSM1     |
|-------------------------------------|-------------------------------------|------------------|----------------|---------------------------|
| <i>Pf</i> DHODH                     | 18±0.50                             | 16±2.2           | 71±22          | 0.047 ± 0.02 <sup>a</sup> |
| <i>Pf</i> DHODH <sub>Δ384-413</sub> | 18±0.43                             | 21±2.1           | 105±39         | 0.016±0.0016              |

Table S2. PfDHODH inhibitor complexes: X-ray diffraction data and refinement statistics

| <b>Data collection</b>  | DSM1                                                             | DSM2                                                             | DSM74                                                            |
|-------------------------|------------------------------------------------------------------|------------------------------------------------------------------|------------------------------------------------------------------|
| Resolution (Å)          | 50.0-2.02                                                        | 50-2.4                                                           | 50-2.7                                                           |
| Space group             | P64                                                              | P64                                                              | P64                                                              |
| Cell dimensions         | $a=b=85.9, c=138.4$<br>$\alpha=\beta=90^\circ, \gamma=120^\circ$ | $a=b=85.9, c=138.7$<br>$\alpha=\beta=90^\circ, \gamma=120^\circ$ | $a=b=85.4, c=138.4$<br>$\alpha=\beta=90^\circ, \gamma=120^\circ$ |
| Unique reflections      | 42,198                                                           | 22,633                                                           | 15,754                                                           |
| Completeness (%)        | 91.4 (67.9)                                                      | 100 (100)                                                        | 100 (99)                                                         |
| Redundancy              | 12 (3.6)                                                         | 7.3 (7.5)                                                        | 7.6 (7.7)                                                        |
| $I/\sigma$              | 45.7 (1.5)                                                       | 41.9 (4)                                                         | 45.2 (4)                                                         |
| $R_{\text{sym}}$ (%)    | 5.8 (51.5)                                                       | 5.3 (51.7)                                                       | 6.5 (49.8)                                                       |
| <b>Refinement</b>       |                                                                  |                                                                  |                                                                  |
| Solvent (%)             | 62                                                               | 63                                                               | 63.6                                                             |
| $R_{\text{factor}}$ (%) | 23.1                                                             | 22.5                                                             | 23.6                                                             |
| $R_{\text{free}}$ (%)   | 24.8                                                             | 26.7                                                             | 27.6                                                             |
| No. of atoms            | 3138                                                             | 3193                                                             | 3083                                                             |
| No. of water atoms      | 124                                                              | 63                                                               | 39                                                               |
| rms deviations          |                                                                  |                                                                  |                                                                  |
| Bond length (Å)         | 0.01                                                             | 0.01                                                             | 0.007                                                            |
| Bond angles (deg.)      | 1.3                                                              | 1.24                                                             | 1.04                                                             |
| Ramachandran plot       |                                                                  |                                                                  |                                                                  |
| Most favored (%)        | 90.9                                                             | 92.3                                                             | 89.9                                                             |
| Additionally allowed    | 8.8                                                              | 7.4                                                              | 9.8                                                              |
| Generously allowed      | 0.3                                                              | 0.3                                                              | 0.3                                                              |

**Table S3.** Data collection details for the structures of DSM1, DSM15, DSM16 and DSM74.

| Compound | Stepsize °/frame | Exposure (seconds) | Full & partial reflections |
|----------|------------------|--------------------|----------------------------|
| DSM1     | 0.9              | 30                 | 29,175                     |
| DSM15    | 1.5              | 30                 | 34,855                     |
| DSM16    | 2.0              | 30                 | 29,924                     |
| DSM74    | 1.0              | 80                 | 35,811                     |

**Table S4:** Small molecule crystallographic data for the DSM1, DSM15, DSM16 and DSM74.

| Property                        | DSM1                                     | DSM15                   | DSM16                                                  | DSM74                                       |
|---------------------------------|------------------------------------------|-------------------------|--------------------------------------------------------|---------------------------------------------|
| Empirical Formula               | C16 H13 Cl N5                            | C16 H12 N4 S            | C16 H12 N4 O                                           | C13 H10 F3 N5,<br>0.147(H <sub>2</sub> O)   |
| Formula Weight                  | 310.76                                   | 292.36                  | 276.30                                                 | 295.91                                      |
| Temperature K                   | 130(2)                                   | 130(2)                  | 130(2)                                                 | 130(2)                                      |
| Wavelength Å                    | 0.71073                                  | 0.71073                 | 0.71073                                                | 0.71073                                     |
| Habit/color                     | prism / colorless                        | prism / colorless       | plate / colorless                                      | needle / colorless                          |
| Size (mm <sup>3</sup> )         | 0.59 x 0.14 x 0.07                       | 0.50 x 0.20 x<br>0.12   | 0.30 x 0.15 x 0.06                                     | 0.59 x 0.07 x<br>0.07                       |
| Crystal System,<br>space group  | Tetragonal, P 4 <sub>3</sub><br>(No. 78) | Triclinic,<br>(No. 2)   | P $\bar{1}$ Monoclinic, P2 <sub>1</sub> /c<br>(No. 14) | Tetragonal, I<br>4 <sub>1</sub> /a (No. 88) |
| Unit Cell<br>Dimensions         |                                          |                         |                                                        |                                             |
| a, Å                            | 7.5871(3)                                | 15.2471(3)              | 12.137(2)                                              | 35.812(3)                                   |
| b, Å                            | 7.5871(3)                                | 18.8854(4)              | 10.8958(18)<br>9.8599(15)                              | 35.812(3)                                   |
| c, Å                            | 24.9960(10)                              | 36.1826(9)              |                                                        | 3.9556(3)                                   |
| $\alpha$ , °                    | 90                                       | 100.728(7)<br>93.349(8) | 90.00<br>92.213(8)                                     | 90                                          |
| $\beta$ , °                     | 90                                       | 99.481(12)              | 90.00                                                  | 90                                          |
| $\gamma$ , °                    | 90                                       |                         |                                                        | 90                                          |
| Volume (Å <sup>3</sup> )        | 1438.87(10)                              | 676.7(3)                | 1303.0(4)                                              | 5073.1(7)                                   |
| Density Mg/m <sup>3</sup>       | 1.4435                                   | 1.435                   | 1.408                                                  | 1.550                                       |
| Reflections<br>Collected/Unique | 2985 / 2985                              | 3939 / 2378             | 4132/2329                                              | 3525/2066                                   |
| Rint / R $\sigma$               | 0.0980 / 0.1335                          | 0.1140 / 0.1869         | 0.1494 / 0.2190                                        | 0.0956 / 0.1224                             |
| $\theta$ m / completeness       | 25° / 100.0%                             | 25° / 99.2%             | 25° / 98.0%                                            | 25° / 88.8%                                 |

---

|                              |        |        |        |        |
|------------------------------|--------|--------|--------|--------|
| Goodness of Fit              | 0.953  | 0.933  | 0.856  | 0.937  |
| Final R indices<br>[I>2σ(I)] |        |        |        |        |
| R1                           | 0.0604 | 0.0733 | 0.0586 | 0.0530 |
| wR2                          | 0.1350 | 0.1498 | 0.1012 | 0.1084 |
| R indices (all data)         |        |        |        |        |
| R1                           | 0.1207 | 0.1682 | 0.1772 | 0.1496 |
| wR2                          | 0.1560 | 0.1899 | 0.1286 | 0.1453 |

---

Table S5: Selected Bond distances for the structures DSM1, DSM15, DSM16 and DSM74.

| Bond             | <b>DSM1</b>           | <b>DSM15</b> | <b>DSM16</b> | <b>DSM74</b>    |
|------------------|-----------------------|--------------|--------------|-----------------|
| C7 – N1/S1/O1/N1 | 1.438(6) <sup>a</sup> | 1.769(5)     | 1.424(3)     | 1.42(2)/1.44(2) |
| C1 – N1/S1/O1/N1 | 1.313(6)              | 1.740(4)     | 1.338(3)     | 1.344(4)        |
| C1 – N2          | 1.381(5)              | 1.362(6)     | 1.358(4)     | 1.372(4)        |
| N2 – N3          | 1.364(5)              | 1.363(5)     | 1.372(3)     | 1.382(4)        |
| N3 – C5          | 1.318(6)              | 1.312(6)     | 1.343(4)     | 1.327(5)        |
| C5 – N4          | 1.364(6)              | 1.362(6)     | 1.352(4)     | 1.348(5)        |
| N4 – C4          | 1.320(6)              | 1.334(6)     | 1.340(4)     | 1.333(4)        |
| C4 – N2          | 1.368(6)              | 1.373(6)     | 1.379(4)     | 1.377(4)        |
| C4 – N5          | 1.342(6)              | 1.364(6)     | 1.333(4)     | 1.341(4)        |
| N5 – C3          | 1.368(6)              | 1.323(6)     | 1.327(4)     | 1.337(5)        |
| C2 – C3          | 1.379(7)              | 1.403(6)     | 1.411(4)     | 1.393(5)        |
| C1 – C2          | 1.404(6)              | 1.376(5)     | 1.360(4)     | 1.372(5)        |

<sup>a</sup> Standard mean. Error of the last digit is in parenthesis.

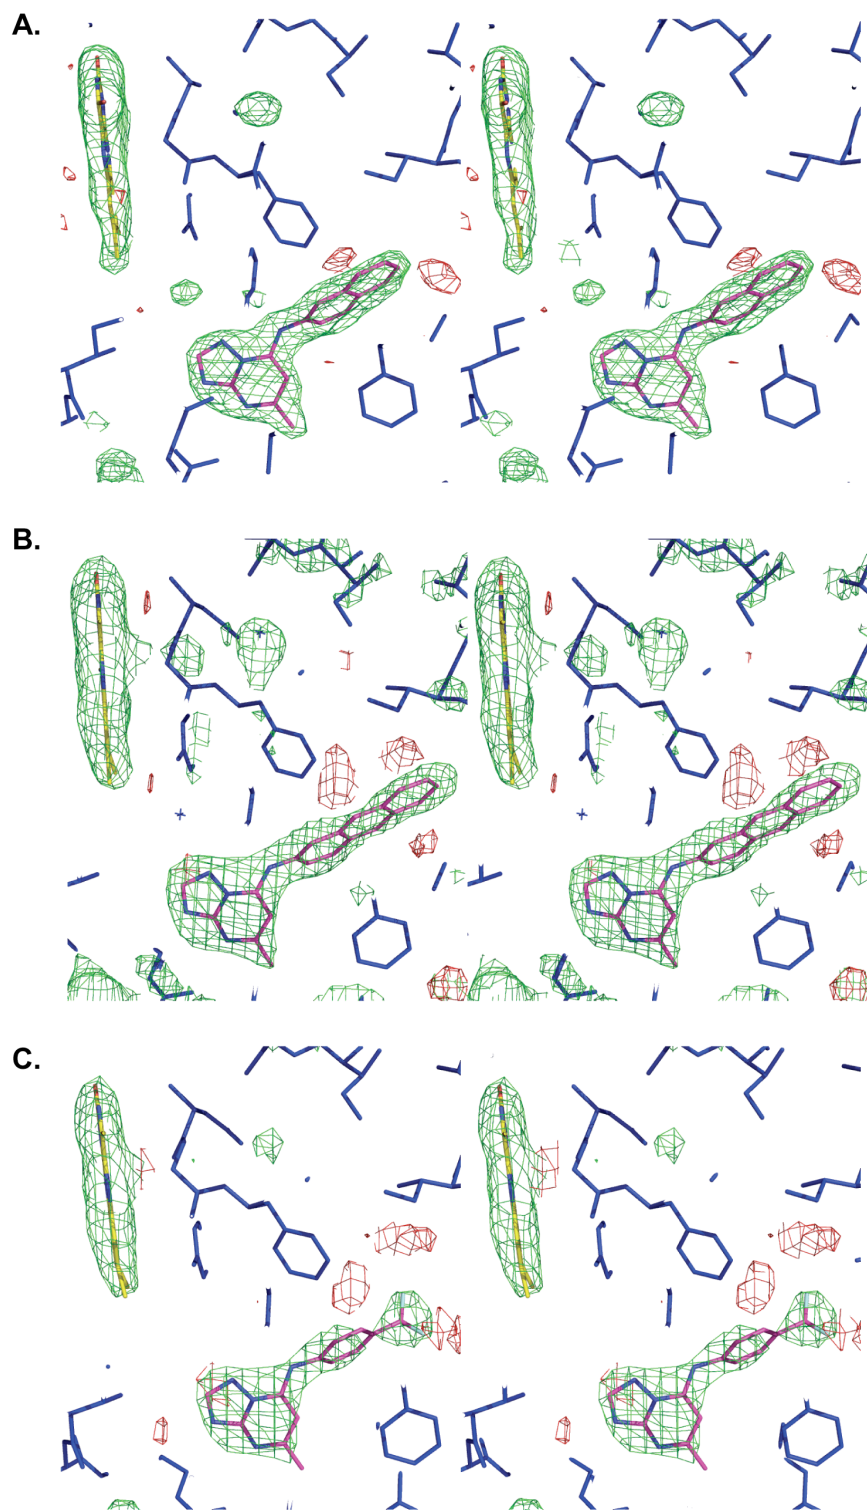

Figure S1. Stereo electron density difference maps ( $F_o - F_c$ ) for *Pf*DHODH bound to A) DSM1, B) DSM2 and C) DSM74. Maps were calculated based on the original molecular replacement solution (without cofactors and inhibitors included). The final structure is overlaid on the map. Inhibitor is displayed in pink, FMN is displayed in yellow, and the protein is displayed in dark blue. Difference maps of A) and C) are contoured at  $3\sigma$  while B) is contoured at  $2\sigma$ . Positive density is displayed in green and native density is displayed in red.

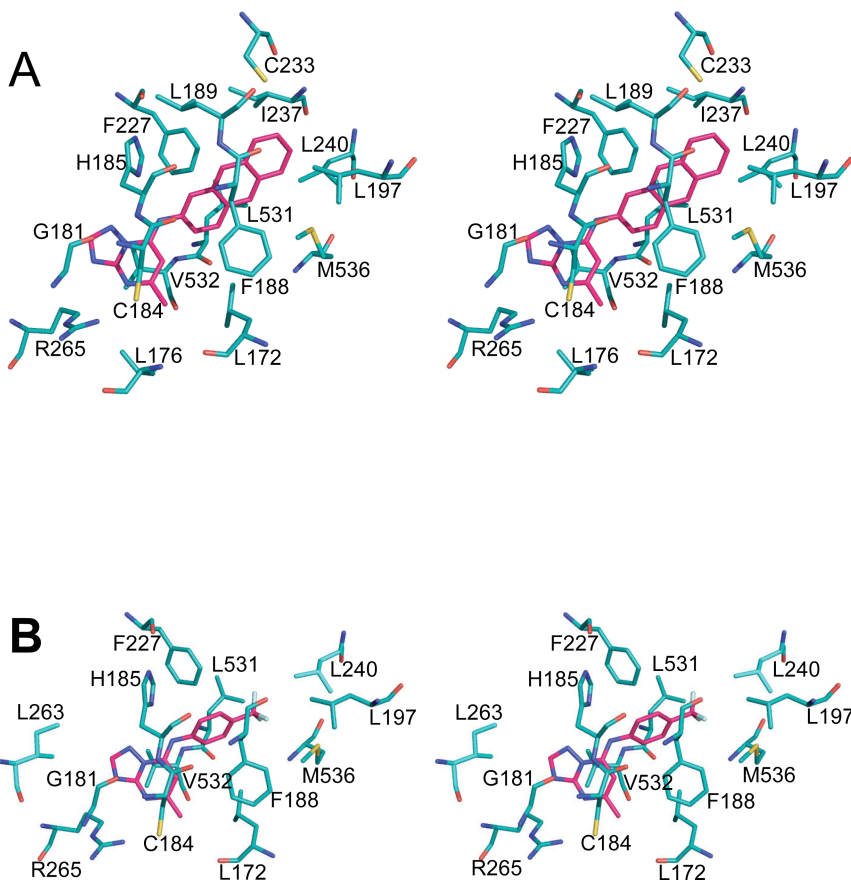

Figure S2. Inhibitor binding sites of *PfDHODH* bound to A. DSM2 and B. DSM74 displayed as stereo pairs for residues within 4Å of the bound inhibitor. Inhibitors are displayed in pink, and residues are displayed in turquoise.

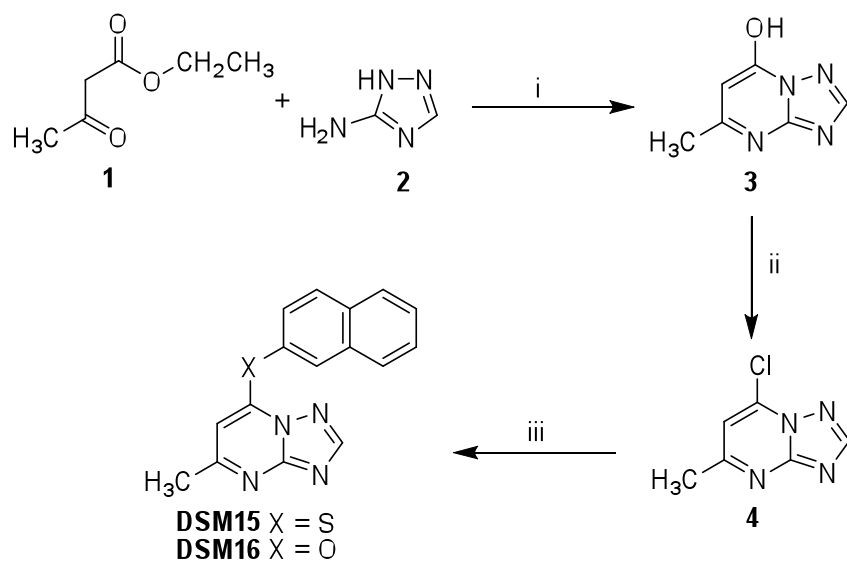

<sup>a</sup> Reagents and conditions: (i) AcOH, 3.5 h, reflux, 55%; (ii) POCl<sub>3</sub>, 45 min., reflux, 58%; (iii) 2-Thionaphthol/2-Naphthol, K<sub>2</sub>CO<sub>3</sub>, DMF, 20 h, rt, 70-72%.

**Fig S3.** Synthetic strategy for compounds DSM15 and DSM16<sup>a</sup>.

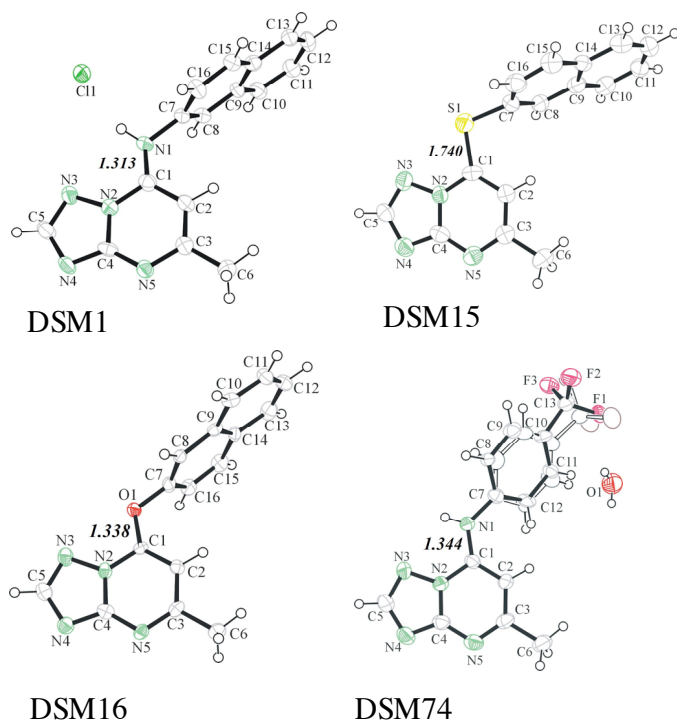

**Fig. S4.** ORTEP drawing of DSM compounds with thermal ellipsoids at the 50% probability level. The disordered units for DSM74 are differentiated by depicting one half in normal coloring, the other in contours only. The N1-C1 bond distances (Å) are displayed.
